# Supplementary material
Source: publisher figshare collection journal article supplement (https://frontiersin.figshare.com/ndownloader/files/30805744)
Supplement: Supplementary file 1 [file 30805744]

9	230	12	24	16	23	12	23	14	23	24	21	7	24	19	1	230
			TG1	TG2	TG3	TG4	CH5	CH6	CH7	CH8	CH9	CH10	CH11	CH12
IND	POP	RMV10		RMV20		RMV22		RMV38		RV31		RV29		RV32		RV45		RV40
295	TG1	91	106	88	108	102	104	120	120	180	180	157	157	177	183	170	170	232	232
296	TG1	103	103	88	88	106	106	120	120	180	180	160	160	177	177	178	178	230	230
297	TG1	103	103	88	88	106	106	120	120	0	0	0	0	177	177	0	0	230	230
298	TG1	103	103	88	88	106	106	120	120	180	180	160	160	177	177	178	180	230	230
299	TG1	103	103	88	88	106	106	120	120	180	180	160	160	177	177	178	178	230	230
300	TG1	103	103	88	88	106	106	120	120	180	180	160	160	177	177	178	178	230	230
301	TG1	103	103	88	88	106	106	120	120	180	180	160	160	177	177	178	178	230	230
302	TG1	103	103	88	88	106	106	120	120	180	180	160	160	177	177	178	178	230	230
303	TG1	103	103	88	88	106	106	120	120	180	180	160	160	177	177	178	178	230	230
304	TG1	103	103	88	88	106	106	120	120	180	180	0	0	177	177	178	178	230	230
305	TG1	103	103	88	88	106	106	120	120	180	180	160	160	177	177	178	178	230	230
306	TG1	103	103	88	88	106	106	120	120	180	180	160	160	177	177	178	178	230	230
307	TG1	103	103	88	88	106	106	120	120	180	180	160	160	177	177	178	178	230	230
308	TG1	103	103	88	88	106	106	120	120	180	180	160	160	177	177	178	178	230	230
309	TG1	103	103	88	88	106	106	120	120	180	180	160	160	177	177	178	178	230	230
310	TG1	103	103	88	88	106	106	120	120	180	180	160	160	177	177	178	178	230	230
311	TG1	103	103	88	88	106	106	120	120	180	180	160	160	177	177	178	178	230	230
312	TG1	103	103	88	88	106	106	120	120	180	180	160	160	177	177	178	178	230	230
313	TG1	103	103	88	88	106	106	120	120	180	180	160	160	177	177	178	178	230	230
314	TG1	103	103	88	88	106	106	120	120	180	180	160	160	177	177	178	178	230	230
315	TG1	103	103	88	88	106	106	120	120	180	180	160	160	177	177	178	178	230	230
316	TG1	103	103	88	88	106	106	120	120	180	180	160	160	177	177	178	178	230	230
317	TG1	103	103	88	88	106	106	120	120	180	180	160	160	177	177	178	178	230	230
318	TG1	100	100	88	88	104	104	120	120	182	182	147	147	179	179	178	178	230	236
327	TG2	85	85	102	102	98	98	120	120	0	0	0	0	177	177	0	0	230	230
329	TG2	85	91	88	102	98	104	120	126	174	182	157	160	177	177	166	172	230	230
330	TG2	85	85	102	102	98	98	120	120	182	182	157	157	177	177	172	172	230	230
331	TG2	112	112	88	88	106	106	120	120	174	174	157	157	179	179	174	174	234	234
333	TG2	85	85	88	88	98	98	120	120	174	174	157	157	177	177	172	172	230	230
336	TG2	85	85	102	102	98	98	120	120	182	182	157	157	177	177	172	172	230	230
337	TG2	85	85	102	102	98	98	0	0	182	182	157	157	177	177	172	172	230	230
338	TG2	85	85	102	102	98	98	120	126	182	182	157	157	177	177	172	172	230	230
339	TG2	85	85	102	102	98	98	120	120	182	182	157	157	177	177	172	172	230	230
343	TG2	85	85	102	102	98	98	120	120	182	182	157	157	177	177	0	0	230	230
344	TG2	85	85	102	102	98	98	120	120	0	0	157	157	177	177	0	0	230	230
345	TG2	85	85	102	102	98	98	120	126	182	182	157	157	177	177	172	172	230	230
346	TG2	85	85	88	88	98	98	120	120	174	174	157	157	177	177	172	172	230	230
347	TG2	85	85	102	102	98	98	120	126	182	182	157	157	177	177	172	172	230	230
348	TG2	85	85	88	88	98	98	120	120	174	174	157	157	177	177	172	172	230	230
350	TG2	91	91	88	88	106	106	120	126	174	174	160	166	177	177	166	166	230	230
234	TG3	103	103	88	88	106	106	120	120	180	180	160	160	177	177	170	178	230	230
235	TG3	91	91	88	88	102	102	120	120	180	180	157	157	177	177	170	170	232	232
236	TG3	91	91	88	88	102	102	120	120	180	180	157	157	177	177	170	170	232	232
237	TG3	91	91	88	108	104	104	120	120	180	180	0	0	183	183	0	0	232	232
238	TG3	103	103	88	88	104	104	120	120	180	180	160	160	177	177	178	178	232	232
240	TG3	103	103	88	88	104	104	120	120	174	174	160	160	177	177	178	178	230	230
241	TG3	91	91	88	88	104	104	120	120	182	182	160	160	177	177	178	178	230	230
242	TG3	91	100	88	102	104	104	120	120	174	174	147	147	177	177	164	164	0	0
243	TG3	91	91	88	108	104	104	120	120	180	180	147	147	177	177	170	170	232	232
244	TG3	91	91	88	88	104	104	120	120	180	180	147	147	183	183	170	170	232	232
245	TG3	91	106	108	108	102	102	120	120	180	180	147	147	177	177	170	170	232	232
246	TG3	91	91	88	88	106	106	120	120	174	174	160	160	177	177	178	178	232	232
247	TG3	91	91	108	108	102	104	120	120	180	180	147	157	177	177	170	170	232	232
248	TG3	91	106	88	108	102	104	120	120	180	180	147	157	177	183	170	170	232	232
249	TG3	106	106	88	88	102	102	120	120	180	180	147	157	177	177	170	170	232	232
250	TG3	91	103	88	108	104	104	120	120	174	180	147	160	177	183	166	170	230	232
251	TG3	91	91	88	108	102	102	120	120	180	180	147	157	177	183	170	170	232	232
252	TG3	91	106	88	108	102	104	120	120	180	180	147	157	177	183	170	170	232	232
253	TG3	91	91	88	88	102	102	120	120	180	180	157	157	177	177	170	170	232	232
254	TG3	91	91	108	108	104	104	120	120	180	180	157	157	177	183	170	172	232	232
255	TG3	91	106	88	108	102	104	120	120	180	180	147	157	177	183	170	170	232	232
256	TG3	91	91	88	108	102	104	120	120	180	180	147	157	177	183	170	170	232	232
257	TG3	91	91	88	88	106	106	120	120	174	174	147	147	177	177	166	166	230	230
265	TG4	106	106	108	108	106	106	120	120	180	180	160	160	177	177	170	170	230	230
268	TG4	106	106	108	108	106	106	120	120	180	180	160	160	177	177	170	170	232	232
269	TG4	106	106	108	108	102	102	120	120	180	180	157	157	183	183	170	170	232	232
270	TG4	106	106	108	108	102	102	120	120	180	180	157	157	183	183	170	170	232	232
271	TG4	103	106	88	108	102	106	120	120	180	182	157	163	177	183	170	176	232	236
272	TG4	106	106	108	108	102	106	120	120	180	180	163	163	177	177	170	178	232	236
274	TG4	91	106	108	108	102	102	120	126	180	180	157	157	183	183	170	170	232	232
275	TG4	106	106	108	108	102	102	120	120	180	180	157	157	183	183	170	170	232	232
278	TG4	106	106	108	108	106	106	120	126	180	180	160	160	177	177	0	0	230	230
280	TG4	106	106	108	108	106	106	120	120	180	180	160	160	177	177	170	170	230	230
282	TG4	103	103	102	102	106	106	120	120	182	182	163	163	177	177	176	176	230	236
288	TG4	100	100	88	88	106	106	120	120	174	174	160	160	177	177	166	166	230	236
90	CH5	103	103	105	105	100	100	118	118	180	180	0	0	181	181	172	172	234	234
91	CH5	103	103	105	105	102	102	118	118	180	180	157	157	181	181	172	172	234	234
92	CH5	103	103	105	105	102	102	118	118	180	180	157	157	181	181	172	172	234	234
93	CH5	103	103	105	105	102	102	118	118	180	180	157	157	181	181	172	172	234	234
94	CH5	100	100	105	105	102	102	118	118	180	180	0	0	181	181	170	170	234	234
95	CH5	103	103	105	105	102	102	118	118	180	180	157	157	181	181	172	172	234	234
96	CH5	103	103	105	105	102	102	118	118	180	180	157	157	181	181	172	172	234	234
97	CH5	103	103	105	105	102	102	118	118	180	180	157	157	181	181	172	172	234	234
98	CH5	103	103	105	105	102	102	118	118	180	180	157	157	181	181	172	172	234	234
99	CH5	103	103	88	88	104	104	120	120	180	180	147	147	177	177	172	172	238	238
100	CH5	103	103	105	105	102	102	118	118	180	180	157	157	181	181	172	172	234	234
101	CH5	103	103	88	88	104	104	120	120	180	180	157	157	177	177	172	172	232	232
102	CH5	103	103	88	88	104	104	120	120	180	180	147	147	177	177	174	174	234	234
103	CH5	103	103	105	105	102	102	118	118	180	180	147	147	181	181	172	172	238	238
104	CH5	112	112	105	105	102	102	118	118	180	180	157	157	181	181	170	170	234	234
105	CH5	103	103	105	105	102	102	118	118	180	180	157	157	179	179	170	170	234	234
106	CH5	103	103	105	105	102	102	118	118	180	180	157	157	181	181	172	172	234	234
107	CH5	103	103	105	105	102	102	118	118	180	180	157	157	181	181	172	172	234	234
108	CH5	100	100	105	105	104	104	118	118	180	180	157	157	177	177	172	172	232	232
109	CH5	103	103	105	105	102	102	118	118	180	180	157	157	181	181	172	172	234	234
110	CH5	103	103	105	105	102	102	118	118	180	180	157	157	181	181	172	172	234	234
111	CH5	100	100	105	105	102	102	118	118	180	180	157	157	181	181	170	170	234	234
113	CH5	100	100	105	105	102	102	118	118	180	180	157	157	181	181	170	170	234	234
2	CH6	103	103	105	105	102	102	118	118	178	178	0	0	181	181	172	172	234	234
3	CH6	103	103	105	105	102	102	118	118	180	180	155	157	181	181	174	174	234	234
4	CH6	103	103	105	105	102	102	118	126	180	180	155	155	0	0	172	172	0	0
5	CH6	103	103	105	105	102	102	118	118	180	180	157	157	181	181	172	172	234	234
6	CH6	103	103	105	105	102	102	118	126	180	180	157	157	181	181	172	172	234	234
7	CH6	103	103	105	105	102	102	118	118	180	180	157	157	181	181	172	172	234	234
8	CH6	103	103	105	105	102	102	118	126	180	180	157	157	181	181	172	172	234	234
11	CH6	103	103	105	105	102	102	126	126	180	182	157	163	181	181	172	176	234	236
13	CH6	103	103	105	105	102	102	118	118	180	180	0	0	181	181	172	172	234	234
15	CH6	103	103	105	105	102	102	118	118	180	180	157	157	181	181	172	172	234	234
16	CH6	103	103	105	105	102	102	118	118	180	180	157	157	181	181	172	172	234	234
17	CH6	103	103	105	105	102	102	118	118	180	180	157	157	181	181	172	172	234	234
18	CH6	103	103	105	105	102	102	118	118	180	180	157	157	181	181	172	172	234	234
19	CH6	103	103	105	105	102	102	118	118	180	180	0	0	181	181	172	172	234	234
31	CH7	100	100	105	105	106	106	120	120	180	180	147	147	177	177	178	178	238	238
32	CH7	103	103	105	105	102	102	118	118	180	180	157	157	181	181	172	172	234	234
33	CH7	103	103	105	105	102	102	118	118	180	180	157	157	181	181	172	172	234	234
34	CH7	103	103	105	105	102	102	118	118	180	180	157	157	181	181	172	172	234	234
35	CH7	85	85	105	105	106	106	118	118	182	182	147	147	177	177	176	176	238	238
36	CH7	85	85	105	105	106	106	118	118	182	182	147	147	177	177	176	176	238	238
37	CH7	103	103	105	105	102	102	118	118	180	180	157	157	181	181	172	172	234	234
38	CH7	103	103	105	105	102	102	118	118	180	180	157	157	181	181	172	172	234	234
39	CH7	103	103	105	105	102	102	118	118	182	182	157	157	181	181	172	172	234	234
40	CH7	85	85	105	105	106	106	118	118	182	182	147	147	177	177	176	176	238	238
41	CH7	105	105	105	105	102	102	118	118	180	180	157	157	181	181	172	172	234	234
42	CH7	103	103	105	105	102	102	118	118	180	180	0	0	181	181	172	172	234	234
43	CH7	100	100	105	105	102	102	118	118	180	180	157	157	181	181	172	172	234	234
44	CH7	85	85	105	105	106	106	118	118	182	182	147	147	177	177	176	176	238	238
45	CH7	103	103	105	105	102	102	118	118	180	180	157	157	181	181	172	172	234	234
46	CH7	103	103	105	105	102	102	118	118	180	180	157	157	181	181	172	172	234	234
47	CH7	103	103	105	105	102	102	118	118	180	180	157	157	181	181	172	172	234	234
48	CH7	103	103	105	105	102	102	118	118	180	180	157	157	181	181	172	172	234	234
49	CH7	85	85	105	105	106	106	118	118	182	182	147	147	177	177	176	176	238	238
50	CH7	103	103	105	105	102	102	118	118	180	180	157	157	181	181	172	172	234	234
51	CH7	103	103	105	105	102	102	118	118	180	180	157	157	181	181	172	172	234	234
52	CH7	103	103	105	105	102	102	118	118	180	180	147	147	181	181	172	172	238	238
53	CH7	103	103	105	105	102	102	118	118	180	180	157	157	181	181	172	172	234	234
60	CH8	103	103	105	105	102	102	118	118	180	180	157	157	181	181	172	172	234	234
61	CH8	103	103	105	105	102	102	118	118	180	180	157	157	181	181	172	172	234	234
62	CH8	103	103	105	105	106	106	118	118	182	182	157	157	177	177	172	172	238	238
63	CH8	103	103	88	88	104	104	120	120	180	180	147	147	177	177	172	178	232	232
64	CH8	103	103	105	105	102	102	118	118	180	180	157	157	181	181	172	172	234	234
65	CH8	103	103	105	105	102	102	118	118	180	180	147	147	181	181	172	172	238	238
66	CH8	103	103	105	105	102	102	118	118	180	180	147	147	181	181	172	172	238	238
67	CH8	103	103	88	88	104	104	120	120	180	180	0	0	177	177	172	172	232	232
68	CH8	103	103	105	105	102	102	118	118	180	180	157	157	181	181	172	172	236	236
69	CH8	103	103	105	105	102	102	118	118	180	180	157	157	181	181	172	172	234	234
70	CH8	100	100	103	103	100	100	116	116	180	180	157	157	181	181	172	172	234	234
71	CH8	103	103	105	105	102	102	118	118	180	180	157	157	181	181	172	172	234	234
72	CH8	103	103	105	105	102	102	118	118	180	180	157	157	181	181	172	172	234	234
73	CH8	103	103	105	105	102	102	118	118	180	180	157	157	181	181	172	172	234	234
74	CH8	103	103	105	105	102	102	118	118	180	180	157	157	181	181	172	172	234	234
75	CH8	103	103	105	105	102	102	120	120	180	182	157	163	181	181	176	176	236	236
76	CH8	85	85	105	105	102	102	118	118	180	180	157	157	181	181	176	176	238	238
77	CH8	85	85	105	105	102	102	118	126	180	180	147	147	181	181	176	176	234	234
78	CH8	103	103	105	105	102	102	118	118	180	180	147	147	181	181	172	172	238	238
79	CH8	103	103	105	105	102	102	118	118	180	180	157	157	181	181	172	172	234	234
80	CH8	103	103	105	105	102	102	118	118	180	180	157	157	181	181	172	172	234	234
81	CH8	103	103	88	88	104	104	120	120	180	180	147	147	177	177	174	174	238	238
82	CH8	103	103	105	105	102	102	118	118	180	180	157	157	181	181	172	172	234	234
83	CH8	103	103	88	88	104	104	120	120	180	180	147	147	177	177	174	174	232	232
124	CH9	103	103	105	105	102	102	118	118	180	180	0	0	181	181	172	172	234	234
125	CH9	103	103	105	105	102	102	118	118	180	180	157	157	181	181	172	172	234	234
126	CH9	103	103	105	105	106	106	118	118	180	180	157	157	177	177	172	172	238	238
127	CH9	103	103	105	105	102	102	118	118	180	180	157	157	181	181	172	172	234	234
128	CH9	103	103	105	105	102	102	118	118	180	180	157	157	181	181	174	174	234	234
129	CH9	103	103	105	105	102	102	118	118	180	180	157	157	181	181	172	172	234	234
130	CH9	103	103	105	105	102	102	118	118	180	180	157	157	181	181	172	172	234	234
131	CH9	103	103	105	105	102	102	118	118	180	180	157	157	181	181	172	172	234	234
132	CH9	103	103	105	105	102	102	118	118	180	180	157	157	181	181	172	172	234	234
133	CH9	103	103	105	105	102	102	118	118	180	180	0	0	181	181	0	0	234	234
134	CH9	85	85	105	105	102	102	118	118	180	180	157	157	181	181	176	178	238	238
136	CH9	103	103	105	105	102	102	118	118	180	180	157	157	181	181	170	170	234	234
137	CH9	103	103	105	105	102	102	118	118	180	180	157	157	181	181	172	172	234	234
138	CH9	103	103	105	105	106	106	118	118	182	182	157	157	177	177	172	172	238	238
139	CH9	103	103	105	105	106	106	118	118	182	182	147	147	177	177	176	176	238	238
140	CH9	100	103	105	105	102	102	118	118	180	180	147	147	181	181	172	172	238	238
141	CH9	103	103	105	105	106	106	118	118	182	182	147	147	177	177	176	176	238	238
142	CH9	103	103	105	105	102	102	118	118	180	180	0	0	181	181	172	172	234	234
143	CH9	103	103	105	105	102	102	118	118	180	180	154	157	181	181	172	172	234	234
185	CH10	103	103	105	105	102	102	118	118	180	180	157	157	181	181	172	172	234	234
191	CH10	103	103	105	105	102	102	118	118	180	180	157	157	181	181	172	172	234	234
192	CH10	103	103	105	105	102	102	118	118	180	180	157	157	181	181	172	172	234	234
193	CH10	103	103	105	105	102	102	118	118	180	180	157	157	181	181	172	172	234	234
194	CH10	103	103	105	105	102	102	118	118	180	180	160	160	181	181	172	172	234	234
195	CH10	103	103	105	105	102	102	120	120	182	182	163	163	181	181	176	176	236	236
196	CH10	103	103	105	105	102	102	118	118	180	180	157	157	181	181	172	172	234	234
151	CH11	103	103	88	88	104	104	120	120	180	180	147	147	177	177	174	174	238	238
152	CH11	103	103	105	105	104	104	118	126	180	180	157	157	181	181	172	172	234	234
153	CH11	103	103	105	105	102	102	118	118	180	180	157	157	181	181	172	172	234	234
154	CH11	103	103	88	88	104	104	120	120	180	180	147	147	177	177	172	172	238	238
155	CH11	85	85	105	105	102	102	118	118	180	180	157	157	181	181	176	176	238	238
156	CH11	103	103	88	88	104	104	120	120	180	180	147	147	177	177	174	174	238	238
157	CH11	103	103	105	105	102	102	118	118	180	180	157	157	181	181	172	172	234	234
158	CH11	103	103	105	105	102	102	118	118	180	180	157	157	181	181	170	172	234	234
159	CH11	100	100	88	88	104	104	120	120	180	180	147	147	177	177	178	178	232	232
160	CH11	103	103	105	105	102	102	118	118	180	182	157	157	181	181	172	172	234	234
161	CH11	103	103	105	105	102	102	118	126	180	180	147	147	181	181	172	172	238	238
162	CH11	103	103	105	105	102	102	118	118	180	180	157	157	181	181	172	172	234	234
163	CH11	103	103	105	105	104	104	120	126	182	182	147	147	177	177	174	174	238	238
164	CH11	103	103	105	105	102	102	118	118	180	180	157	157	181	181	172	172	234	234
165	CH11	103	103	105	105	102	102	118	118	180	180	157	157	181	181	172	172	234	234
166	CH11	100	100	105	105	106	106	120	120	180	180	147	147	177	177	178	178	236	236
167	CH11	100	100	105	105	102	102	118	118	180	180	157	157	181	181	172	172	234	234
168	CH11	103	103	105	105	102	102	118	118	180	180	147	147	181	181	172	172	238	238
169	CH11	103	103	105	105	102	102	118	118	180	180	0	0	181	181	172	172	234	234
170	CH11	103	103	88	88	104	104	120	120	180	180	147	147	177	177	172	172	238	238
171	CH11	103	103	105	105	102	102	118	126	180	180	157	157	181	181	172	172	234	234
172	CH11	103	103	88	88	104	104	120	120	180	180	147	147	177	177	174	174	238	238
173	CH11	85	85	105	105	102	102	120	126	182	182	157	157	181	181	174	174	234	234
174	CH11	103	103	88	88	104	104	120	120	180	180	147	147	177	177	174	174	238	238
210	CH12	100	100	103	103	100	100	116	116	180	180	157	157	181	181	172	172	236	236
212	CH12	103	103	105	105	102	102	118	118	180	180	157	157	181	181	172	172	234	234
213	CH12	103	103	105	105	102	102	118	118	178	178	157	157	181	181	172	172	234	234
215	CH12	103	103	105	105	102	102	118	118	180	180	157	157	181	181	172	172	234	234
216	CH12	103	103	105	105	102	102	118	118	180	180	157	157	181	181	172	172	234	234
217	CH12	103	103	105	105	102	102	118	118	180	180	157	157	181	181	172	172	234	234
218	CH12	103	103	105	105	102	102	118	118	180	180	157	157	181	181	172	172	234	234
219	CH12	100	100	88	88	102	102	118	118	180	180	147	147	181	181	178	178	234	234
220	CH12	103	103	105	105	102	102	118	118	180	180	157	157	181	181	172	172	234	234
221	CH12	100	100	105	105	106	106	120	120	180	180	147	147	177	177	178	178	238	238
222	CH12	103	103	105	105	102	102	120	120	182	182	0	0	181	181	176	176	236	236
223	CH12	103	103	105	105	102	102	118	118	180	180	157	157	181	181	172	172	234	234
224	CH12	85	85	105	105	102	102	120	120	182	182	157	157	181	181	174	174	234	234
225	CH12	103	103	105	105	102	102	118	118	180	180	147	147	181	181	172	172	238	238
226	CH12	103	103	105	105	102	102	118	118	180	180	157	157	181	181	172	172	234	234
227	CH12	103	103	88	88	104	104	120	120	180	180	147	147	177	177	174	174	238	238
228	CH12	103	103	105	105	102	102	118	118	180	180	157	157	181	181	172	172	234	234
229	CH12	103	103	105	105	102	102	118	118	180	180	157	157	181	181	172	172	234	234
230	CH12	103	103	105	105	102	102	118	118	180	180	157	157	181	181	172	172	234	234
231	CH12	103	103	105	105	102	102	118	118	180	180	157	157	181	181	172	172	234	234
232	CH12	103	103	105	105	102	102	118	118	180	180	157	157	181	181	172	172	234	234
